# Supplementary material for: Getting back on track: cause-specific dynamics of life expectancy change during and after the COVID-19 pandemic in Argentinian provinces
Source: Research Square preprint supplement (doi:10.21203/rs.3.rs-7697349/v1), 2025-12-03
Supplement: Supplementary file 1 [file 34ca22711e599adeb3e5aceb.xlsx]

## Sheet: Hoja1
Selected socioeconomic and demographic indicators. Argentina.
Province	%65+	Population density (inh/km2)	GVA per capita 2019 (Argentinian pesos/USD*)	% households with Unsatisfied Basic Needs 2022	Infant mortality rate 2019 (per 1.000 births)
CABA	17.3	15,161.30	38,654.21/929.19	4.8	7.3
Tierra del Fuego	6.6	5.90	30,112.67/723.86	13.4	7.1
Santa Cruz	7.4	1.40	25,444.87/611.66	6	7.4
Neuquén	9.3	7.50	24,203.47/581.81	6.6	5.4
Chubut	10	2.60	20,225.87/486.20	5.1	7.8
La Pampa	12.7	2.50	17,121.67/411.58	2.6	9.1
Córdoba	12.4	23.30	13,527.87/325.19	4.3	7.5
Santa Fe	12.7	26.60	13,024.96/313.10	4.9	8.2
Total	11.8	12.50	12,934.57/310.93	6.7	9.2
Entre Ríos	11.9	18.20	11,704.86/281.37	6	9.8
San Luis	10.5	7.20	11,667.65/280.47	6.5	8.6
Río Negro	11	3.70	11,621.19/279.36	5.9	7.8
Santiago del Estero	9	7.70	10,909.07/262.24	9.5	6.6
Buenos Aires	12.1	57.30	10,701.29/257.24	6.3	9.1
Mendoza	12.3	13.70	10,541.37/253.40	6.4	8.3
San Juan	10.7	9.30	9,505.97/228.51	8.1	9.3
La Rioja	9.1	4.20	8,535.27/205.17	8	10.3
Catamarca	10.1	4.20	7,978.60/191.79	6.9	10.5
Salta	9.1	9.30	7,726.34/185.73	14.2	10.6
Chaco	8.8	11.30	7,653.68/183.98	11.2	12.4
Jujuy	9.9	15.20	7,577.08/182.14	10.9	9.9
Tucumán	10.5	76.70	7,229.77/173.79	9.5	13.3
Corrientes	10	13.60	6,845.58/164.56	11.8	12
Misiones	8.3	42.80	5,800.01/139.42	8.7	9.6
Formosa	9.3	8.00	5,780.94/138.96	11.7	13.6
* U$D 1 = AR$41.60 (30/06/2019)
