# Supplementary material for: Getting back on track: cause-specific dynamics of life expectancy change during and after the COVID-19 pandemic in Argentinian provinces
Source: Research Square preprint supplement (doi:10.21203/rs.3.rs-7697349/v1), 2025-12-03
Supplement: Supplementary file 2 [file 3aa88b8448acf3a3267a82ea.xlsx]

## Sheet: Hoja1
Share (%) of R-codes (ill-defined) COD by province and sex 2019–2021
Province	Sex	2019	2020	Dif. 2020-2019	2021	Dif. 2021-2019
Entre Ríos	Women	19.0	19.8	0.8	20.8	1.8
Santiago del Estero	Men	19.0	19.1	0.1	14.7	-4.3
Santiago del Estero	Women	20.8	18.7	-2.1	16.5	-4.4
La Rioja	Women	12.1	17.5	5.4	18.5	6.4
Entre Ríos	Men	17.6	17.0	-0.7	18.0	0.3
Jujuy	Women	12.6	16.5	4.0	13.8	1.3
La Rioja	Men	9.0	14.0	5.0	15.7	6.8
Corrientes	Women	14.2	15.6	1.4	15.7	1.5
Corrientes	Men	14.6	15.3	0.7	13.9	-0.8
Jujuy	Men	14.5	14.3	-0.2	12.7	-1.8
Santa Fe	Women	13.4	13.0	-0.4	13.3	-0.1
Chaco	Women	13.4	12.7	-0.7	12.5	-0.9
Chaco	Men	11.9	12.2	0.2	11.5	-0.4
Santa Fe	Men	12.7	11.4	-1.3	11.1	-1.6
Chubut	Women	9.7	10.4	0.8	11.0	1.3
Catamarca	Women	10.7	10.9	0.2	5.7	-5.0
Chubut	Men	9.7	10.5	0.7	10.1	0.3
Río Negro	Women	12.6	7.1	-5.4	9.2	-3.4
La Pampa	Women	11.3	8.9	-2.4	6.7	-4.6
Río Negro	Men	10.6	7.6	-3.0	8.6	-2.0
Catamarca	Men	11.0	8.4	-2.6	5.1	-5.9
Córdoba	Women	8.8	7.6	-1.3	8.1	-0.7
Córdoba	Men	8.9	7.3	-1.6	7.6	-1.4
La Pampa	Men	9.2	6.8	-2.4	3.9	-5.4
Total	Women	6.9	6.5	-0.4	6.1	-0.8
Formosa	Women	5.9	4.9	-1.0	6.3	0.4
Formosa	Men	4.3	4.6	0.3	6.1	1.8
Total	Men	6.7	6.1	-0.6	5.5	-1.1
Mendoza	Men	4.4	5.0	0.6	4.0	-0.5
Salta	Women	5.9	4.9	-1.0	4.7	-1.2
Mendoza	Women	4.1	4.4	0.4	4.7	0.6
Tierra del Fuego	Men	2.6	3.6	0.9	4.5	1.9
Salta	Men	5.6	4.4	-1.2	4.5	-1.1
Tierra del Fuego	Women	2.9	4.4	1.5	2.6	-0.3
San Juan	Women	4.0	4.3	0.2	3.6	-0.5
San Luis	Women	2.8	3.8	1.0	4.0	1.1
Autonomous City of Buenos Aires	Women	5.0	3.8	-1.1	3.6	-1.4
Buenos Aires	Women	4.1	3.8	-0.2	2.7	-1.3
San Luis	Men	2.0	3.6	1.6	3.7	1.7
Neuquén	Men	4.4	3.6	-0.8	2.0	-2.4
Tucumán	Men	3.0	2.9	0.0	3.5	0.6
San Juan	Men	3.8	3.4	-0.4	3.4	-0.4
Autonomous City of Buenos Aires	Men	4.3	3.4	-0.9	3.1	-1.3
Buenos Aires	Men	3.9	3.4	-0.5	2.5	-1.4
Tucumán	Women	3.1	3.0	-0.1	3.2	0.2
Neuquén	Women	2.3	3.2	0.9	2.2	0.0
Santa Cruz	Women	0.9	0.9	0.0	0.6	-0.3
Santa Cruz	Men	1.1	0.7	-0.4	0.4	-0.7
Misiones	Men	0.2	0.3	0.2	0.2	0.0
Misiones	Women	0.5	0.2	-0.3	0.2	-0.3
