# Supplementary material for: Getting back on track: cause-specific dynamics of life expectancy change during and after the COVID-19 pandemic in Argentinian provinces
Source: Research Square preprint supplement (doi:10.21203/rs.3.rs-7697349/v1), 2025-12-03
Supplement: Supplementary file 3 [file 5f9c8406d4e68df743a1d686.xlsx]

## Sheet: Sheet 1
Province	Men						Women
	Respiratory	Neoplasm	External	CVD	COVID-19	Other	Respiratory	Neoplasm	External	CVD	COVID-19	Other
Total	0.0810595	0.360142	0.123802	0.218489	-0.0828681	0.201794	-0.0322665	0.24414	0.0160847	0.284358	-0.0863541	0.135143
Ciudad Autónoma de Buenos Aires	0.359623	0.478739	0.100758	0.267727	-0.0731108	-0.0127361	0.419293	0.463231	-0.0420587	0.262662	-0.065412	0.111426
Buenos Aires	-0.00538826	0.327736	0.130416	0.178448	-0.0617074	0.177348	-0.146762	0.212822	0.0381223	0.24598	-0.0700735	0.0906054
Catamarca	0.264113	0.235745	-0.177754	0.27734	-0.129604	0.393107	-0.117035	-0.128552	0.100193	0.585413	-0.149842	-0.803779
Córdoba	0.199352	0.508835	-0.0748166	0.0095757	-0.0615559	0.320859	0.274625	0.403445	0.0125459	0.0153757	-0.0575251	0.292378
Corrientes	0.763563	0.554669	0.20626	-0.145409	-0.489081	0.225846	1.02315	0.176255	0.288486	0.750075	-0.431486	-0.25759
Chaco	-0.131905	0.157949	-0.241204	0.252241	-0.0741711	-0.280994	-0.304418	-0.026507	-0.130061	0.134259	-0.0416413	-0.0314005
Chubut	0.634035	0.0634369	0.346327	0.561229	-0.0786759	0.853532	-0.425585	-0.191662	0.0197442	0.349767	-0.0856263	-0.150069
Entre Ríos	0.170498	0.504449	0.0892193	0.474085	-0.0804639	-0.101082	-0.219367	0.26611	0.0654788	0.684902	-0.0953521	0.0547019
Formosa	0.161043	-0.0114532	0.557309	-0.520715	-0.00573758	0.680363	0.279327	0.31649	-0.0486535	0.114813	-0.0376644	0.981599
Jujuy	-0.504034	0.394631	0.0320237	0.251781	-0.0698504	1.15173	-0.798468	-0.0883175	0.0402893	0.276031	-0.0659066	1.32847
La Pampa	0.2247	0.49085	0.308471	-0.353963	-0.131623	0.101275	-0.679855	0.424802	0.00369676	-0.37358	-0.12259	-0.0293889
La Rioja	-0.787053	0.404179	0.242193	0.618752	-0.0690307	0.44936	-0.835663	0.197499	-0.00269504	0.67666	-0.0147013	0.332714
Mendoza	0.127786	0.378716	0.274093	0.716571	-0.162528	0.741062	-0.26658	0.200032	0.0232326	0.82937	-0.153802	0.485419
Misiones	0.371596	0.223933	0.083991	0.56252	-0.0863623	-0.220381	0.368915	0.511442	0.133417	0.765851	-0.107626	-0.0850814
Neuquén	0.530536	0.425174	0.250113	-0.521634	-0.0636228	0.642881	0.811323	0.130701	-0.540834	-0.274914	-0.0950677	0.593041
Río Negro	-0.0362342	0.752337	0.346425	-0.441626	-0.162027	0.579919	-0.0640151	0.529275	0.0531009	-0.26429	-0.1191	0.257348
Salta	-0.083462	0.478074	0.02076	-0.0147117	-0.0222597	0.569851	-0.134215	0.192302	-0.0668209	-0.00456437	-0.078569	0.595126
San Juan	0.374905	0.161866	0.0573483	0.82818	-0.0472376	-0.0982186	0.306265	0.170567	-0.167288	0.131272	-0.047904	0.184766
San Luis	0.54795	0.258777	0.578989	0.548559	-0.104419	0.495855	0.292019	0.190878	-0.168424	0.186229	-0.103428	0.484102
Santa Cruz	0.376656	0.493087	0.153646	0.103847	-0.148252	0.226988	0.11766	0.129938	0.0695927	0.298157	-0.307672	0.5989
Santa Fe	0.0826611	0.231721	-0.0959454	0.187395	-0.0841539	0.101371	0.0617849	0.186027	-0.0019675	0.337401	-0.0875484	0.0565509
Santiago del Estero	0.17046	0.534042	0.326794	0.138381	-0.0579981	-0.112991	0.166714	0.113895	0.155644	0.254007	-0.101768	-0.343154
Tucumán	-0.398084	0.366331	0.593801	0.521923	-0.119829	0.404139	-1.06207	0.277295	0.025722	0.406799	-0.130999	0.520387
Tierra del Fuego, Antártida e Islas del Atlántico Sur	0.209259	0.562079	0.00898983	0.304733	-0.0703381	0.0330652	-0.447977	-0.683893	0.0521047	0.328912	-0.035361	-0.113955
