# Supplementary material for: Getting back on track: cause-specific dynamics of life expectancy change during and after the COVID-19 pandemic in Argentinian provinces
Source: Research Square preprint supplement (doi:10.21203/rs.3.rs-7697349/v1), 2025-12-03
Supplement: Supplementary file 4 [file a7f7cc39829f811db576ef87.xlsx]

## Sheet: Sheet 1
Province	Men							Women
	Respiratory	Neoplasm	External	CVD	COVID-19	Other	COVID-19 contribution	Respiratory	Neoplasm	External	CVD	COVID-19	Other	COVID-19 contribution
Ciudad Autónoma de Buenos Aires	0.179172	0.341659	0.122172	-0.119866	-3.17243	0.16663	127.8	0.520248	0.285561	0.0489044	-0.365149	-2.07084	0.184377	148.2
Salta	-0.56998	0.342019	0.0815039	-0.0334227	-2.38654	0.0705818	95.6	-0.209679	0.115194	0.0878966	-0.308157	-2.2837	0.186011	94.7
Córdoba	-0.169278	0.156052	-0.0241619	-0.102778	-2.77479	0.172009	101.2	0.0352211	0.21255	-0.0442051	-0.205829	-2.35601	0.151258	106.8
Jujuy	-0.648424	0.334309	0.134743	0.21135	-2.8897	0.444113	119.7	-0.784075	0.269898	0.116013	-0.204672	-2.51186	0.194766	86
San Juan	-0.116391	0.0238576	0.136209	0.297382	-2.95159	-0.586484	92.3	0.00925319	0.262749	-0.0412747	-0.296545	-2.53024	-0.210736	90.1
Buenos Aires	0.0187493	0.259138	0.139497	-0.207585	-3.2832	0.00024264	106.8	0.148806	0.160462	0.0570041	-0.258057	-2.7922	0.0669047	106.7
Total	-0.0412727	0.24252	0.147846	-0.1028	-3.34879	0.0463157	109.6	0.130406	0.176256	0.0467387	-0.198873	-2.86864	0.092229	109.4
Misiones	-0.0499723	0.0875917	0.126783	-0.180988	-2.88581	-0.256206	91.4	-0.00606063	0.157614	0.165786	-0.327348	-2.92758	0.105038	103.4
Santa Fe	-0.279983	0.166377	0.00564191	-0.0305721	-3.27772	-0.119744	92.7	0.0801953	0.0977956	0.0264479	-0.083686	-2.95699	-0.0997401	100.7
Mendoza	-0.104863	0.265104	0.196614	-0.178939	-3.43104	0.628466	130.7	-0.294	0.0928656	0.0737783	-0.0394938	-2.96656	0.452731	110.7
Entre Ríos	0.0502113	0.399006	0.122208	0.218527	-3.09113	0.0970767	140.2	0.084109	0.203028	0.00926228	0.0824462	-2.9966	0.185518	123.2
Corrientes	0.497026	0.461314	0.229573	-0.153325	-3.55641	-0.169057	132.2	0.706353	0.172441	0.224216	0.0515281	-3.02429	-0.123991	151.7
Tucumán	-0.327804	0.213317	0.6145	0.0359351	-3.46758	0.221999	128	-0.214392	0.249624	0.0950908	-0.245695	-3.2027	0.340498	107.6
Tierra del Fuego	0.111531	0.508554	-0.0847853	0.341713	-4.39291	-0.106593	121.3	-0.750812	0.0953678	0.0721981	0.273747	-3.29717	0.699464	113.4
San Luis	0.104022	0.119717	0.563335	-0.150852	-3.774	-0.4024	106.6	0.259726	0.101167	-0.118929	-0.31062	-3.3717	-0.50173	85.5
Santa Cruz	0.48605	0.178718	-0.200427	0.217349	-4.27069	-0.156882	114	0.0440812	0.0401339	-0.0193563	0.446889	-3.72783	-0.0645852	113.6
Chubut	0.190941	0.168874	0.296974	0.414846	-3.70135	0.467244	171.2	-0.0700818	-0.0888053	0.168429	0.362208	-3.76447	-0.415195	98.9
Chaco	-0.0566428	0.149812	-0.17593	0.0276429	-3.94081	0.0515382	99.9	0.12913	0.00493123	-0.0220765	-0.107586	-3.88347	0.0924331	102.6
Río Negro	-0.385003	0.333339	0.229121	-0.232209	-4.26337	-0.37853	90.8	-0.158581	0.496111	0.0503756	-0.179113	-3.93931	0.257029	113.4
Formosa	0.0883185	0.180305	0.321476	-0.224521	-5.23972	-0.080466	105.8	0.389475	0.643677	0.0470011	-0.0807804	-4.00225	0.528079	161.7
La Rioja	-0.323424	-0.159368	0.340427	0.472038	-4.50478	-0.0775006	105.9	-0.481309	0.343414	-0.103857	0.432407	-4.13742	-0.0530934	103.4
Catamarca	0.222309	0.334124	0.366119	-0.512286	-4.26261	-0.126291	107.1	0.47073	0.0127418	0.119388	-0.127687	-4.23867	-0.465826	100.2
La Pampa	0.606128	0.387109	0.414753	-0.577837	-4.38642	0.193568	130.4	0.388561	0.250549	0.0689513	-0.561563	-4.38744	-0.220125	98.3
Neuquén	0.159442	0.396777	0.00528328	-0.0335298	-5.40767	0.296308	118	0.78403	-0.0631377	-0.362001	-0.354894	-4.46459	0.598866	115.6
Santiago del Estero	0.0275492	0.14739	0.667555	0.0492873	-4.53205	0.648759	151.5	0.408585	0.219531	0.231451	0.169094	-4.59617	0.53637	151.6
