# Supplementary material for: Getting back on track: cause-specific dynamics of life expectancy change during and after the COVID-19 pandemic in Argentinian provinces
Source: Research Square preprint supplement (doi:10.21203/rs.3.rs-7697349/v1), 2025-12-03
Supplement: Supplementary file 5 [file ca4210e6987e2fac2299c5cb.xlsx]

## Sheet: Sheet 1
causa
