# Supplementary material for: Getting back on track: cause-specific dynamics of life expectancy change during and after the COVID-19 pandemic in Argentinian provinces
Source: Research Square preprint supplement (doi:10.21203/rs.3.rs-7697349/v1), 2025-12-03
Supplement: Supplementary file 6 [file de62e2a62adaa0b100aac2fe.xlsx]

## Sheet: Sheet 1
Population under 10 years old by year and province. Alternative projection taking into account fertility decline.
Province	2019		2020		2021		2022		2023
	Women	Men	Women	Men	Women	Men	Women	Men	Women	Men
Buenos Aires	1.35444e+06	1.43772e+06	1.31541e+06	1.39514e+06	1.26449e+06	1.34227e+06	1.20127e+06	1.2741e+06	1.15665e+06	1.22581e+06
Catamarca	32381.3	33891.5	31708.2	33139.5	30724.1	32067.3	29185.8	30436.8	28108.6	29288.8
Chaco	110680	114218	109570	112966	107389	110792	101998	105141	98274.6	101226
Chubut	48374.7	50465.4	47235.6	49224.8	45568.2	47525.2	43290.4	45113	41681	43399.1
Ciudad Autónoma de Buenos Aires	193415	204491	188331	198770	181074	190801	172020	181115	165634	174237
Corrientes	96292.9	101522	94840.8	99808.7	92679.6	97464.7	88027.8	92495.4	84813.6	89045.1
Córdoba	277769	294740	273720	289851	267038	282178	253647	267816	244347	257754
Entre Ríos	106212	112272	104459	110230	101765	107294	96664.5	101833	93112.6	98006.7
Formosa	54486.1	57380.1	53664.5	56309	52363.5	54855.4	49735.9	52060	47917.8	50113.9
Jujuy	61850.3	65163.8	60215.6	63306.8	58033.6	60820	55130.2	57732.3	53088.3	55541
La Pampa	25606.7	27011.3	24896.8	26249.9	24012.5	25296.3	22811.5	24011.5	21965.6	23101.9
La Rioja	30040	31746.5	29503.9	31022.4	28755.1	30161.6	27314.8	28627.9	26308.4	27548.2
Mendoza	159088	167791	155317	163371	150193	157592	142677	149586	137401	143923
Misiones	118184	124253	117376	122896	115532	120690	109724	114530	105744	110277
Neuquén	54638	57156.1	53350.9	55670.4	51566.3	53677.7	48985.7	50949.7	47173.7	49024.1
Río Negro	57243.4	60534.3	56061.1	59204.8	54323.9	57312.6	51605.8	54401.1	49695.3	52341.7
Salta	129777	136022	126655	132282	122593	127712	116456	121221	112154	116641
San Juan	64975	68470.4	64132	67377.9	63063.9	66155	59897.1	62781.3	57714.5	60441.5
San Luis	37794.6	39974.1	37082.8	39131.2	36182.1	38056.3	34367.4	36119.5	33108.3	34762.1
Santa Cruz	30347.7	32196.6	29658	31422.5	28526.4	30270.2	27104	28737.4	26085.6	27635.5
Santa Fe	259522	272531	254672	267306	248865	260829	236386	247546	227717	238266
Santiago del Estero	84677.6	89456.6	83702.6	88412.7	81744	86332.5	77645.9	81936.3	74796.1	78864.1
Tierra del Fuego, Antártida e Islas del Atlántico Sur	13517.1	14157.3	13394.4	14047.5	13068.7	13695.8	12416.3	13001.6	11952	12505
Total	3.542e+06	3.74154e+06	3.46292e+06	3.65218e+06	3.35367e+06	3.53449e+06	3185760	3354782	3068163	3228219
Tucumán	140689	148378	137972	145040	134120	140645	127399	133489	122716	128466
