# Supplementary material for: Getting back on track: cause-specific dynamics of life expectancy change during and after the COVID-19 pandemic in Argentinian provinces
Source: Research Square preprint supplement (doi:10.21203/rs.3.rs-7697349/v1), 2025-12-03
Supplement: Supplementary file 7 [file f79b14f5dc600950c7af64dd.xlsx]

## Sheet: Hoja1
Robustness check of disturbance in the evolution of life expectancy at birth (LE). LE observed and counterfactual (non-pandemic) scenario and differences. 2019–2021.
Sex	Province	Observed (Obs)			Counterfactual (CF)		Dif. Obs. 2019-2020	Dif. CF 2020	Dif. Obs. 2019-2021	Dif. CF 2021
		2019	2020	2021	2020	2021
Men	Chaco	71.1	70.2	67.2	70.8	70.9	1.0	-0.6	3.9	-3.6
	Formosa	73.1	73.7	68.3	72.3	72.4	-0.6	1.4	4.8	-4.1
	Tucumán	72.7	71.7	70.0	72.7	72.8	1.1	-1.1	2.7	-2.8
	Santiago del Estero	73.0	73.5	70.0	72.8	72.9	-0.5	0.6	3.0	-2.9
	Misiones	73.2	74.4	70.0	73.0	73.2	-1.2	1.4	3.1	-3.1
	La Rioja	74.5	71.9	70.3	74.4	74.6	2.7	-2.6	4.2	-4.3
	Santa Fe	73.9	72.8	70.4	73.6	73.8	1.2	-0.9	3.5	-3.5
	Corrientes	73.3	73.7	70.6	72.9	73.0	-0.4	0.9	2.7	-2.3
	Neuquén	75.3	73.1	70.7	75.4	75.5	2.1	-2.2	4.5	-4.8
	Santa Cruz	74.5	72.4	70.9	75.1	75.5	2.1	-2.7	3.7	-4.6
	Río Negro	75.5	73.0	70.9	75.2	75.4	2.5	-2.2	4.7	-4.5
	San Luis	74.4	74.3	70.9	74.5	74.6	0.1	-0.2	3.5	-3.7
	Buenos Aires	73.8	73.2	71.0	73.7	73.9	0.6	-0.6	2.8	-2.9
	Total	74.0	73.0	71.0	73.9	74.1	1.0	-0.9	3.0	-3.0
	Catamarca	75.1	76.1	71.3	74.5	74.6	-1.0	1.6	3.8	-3.4
	Entre Ríos	73.5	73.7	71.3	73.7	73.9	-0.1	0.0	2.2	-2.5
	Jujuy	73.8	69.0	71.5	74.0	74.2	4.8	-5.0	2.3	-2.7
	Salta	74.0	71.5	71.6	73.5	73.7	2.6	-2.1	2.5	-2.1
	San Juan	74.9	74.1	71.7	74.5	74.7	0.8	-0.4	3.2	-3.0
	Córdoba	74.5	73.4	71.8	74.4	74.6	1.1	-1.0	2.7	-2.8
	Mendoza	75.0	73.6	72.4	75.1	75.2	1.4	-1.5	2.6	-2.9
	Chubut	74.6	73.7	72.4	75.0	75.2	0.9	-1.2	2.2	-2.8
	La Pampa	76.6	78.0	73.3	76.0	76.2	-1.4	2.0	3.4	-2.9
	CABA	75.8	74.3	73.6	76.1	76.3	1.5	-1.8	2.2	-2.7
	Tierra del Fuego	77.2	72.3	73.7	77.2	77.5	4.8	-4.9	3.5	-3.7
Women	Chaco	77.7	77.8	73.9	77.8	77.8	-0.1	0.0	3.8	-3.9
	Santiago del Estero	79.2	80.2	76.2	79.1	79.0	-1.0	1.1	3.0	-2.9
	Tucumán	79.3	78.2	76.3	79.1	79.2	1.1	-0.9	2.9	-2.8
	Formosa	78.7	80.5	76.4	78.5	78.6	-1.8	2.0	2.3	-2.2
	La Rioja	80.6	78.5	76.6	80.5	80.6	2.1	-2.0	4.0	-4.1
	Misiones	79.5	80.0	76.7	79.4	79.6	-0.5	0.6	2.8	-2.9
	Catamarca	80.8	81.6	76.8	80.0	80.1	-0.8	1.6	4.0	-3.3
	San Juan	79.8	79.4	77.0	79.8	80.0	0.4	-0.4	2.8	-3.0
	Corrientes	79.2	80.7	77.3	79.5	79.6	-1.5	1.1	1.9	-2.4
	San Luis	81.2	81.0	77.3	81.0	81.1	0.2	0.0	3.9	-3.8
	Buenos Aires	79.8	79.7	77.4	79.9	80.0	0.1	-0.2	2.4	-2.5
	Santa Fe	80.4	79.5	77.4	80.3	80.4	0.8	-0.8	2.9	-3.0
	Total	80.1	79.6	77.6	80.1	80.2	0.5	-0.5	2.5	-2.6
	Santa Cruz	80.8	79.4	77.6	80.0	79.9	1.4	-0.6	3.2	-2.3
	Jujuy	80.5	77.1	77.6	80.6	80.8	3.4	-3.5	2.8	-3.2
	Salta	80.1	78.4	77.7	79.7	79.8	1.7	-1.3	2.4	-2.1
	Córdoba	80.2	79.8	78.0	80.1	80.2	0.4	-0.3	2.2	-2.2
	Río Negro	81.5	79.4	78.1	81.4	81.4	2.1	-2.0	3.4	-3.4
	Entre Ríos	80.7	80.9	78.3	80.3	80.4	-0.1	0.5	2.4	-2.1
	Neuquén	82.2	80.2	78.4	82.5	82.7	2.0	-2.3	3.8	-4.3
	Mendoza	81.1	79.5	78.4	80.6	80.7	1.6	-1.1	2.7	-2.3
	La Pampa	83.5	83.4	79.1	82.7	82.9	0.1	0.7	4.5	-3.9
	Chubut	82.9	81.3	79.1	82.3	82.5	1.6	-1.0	3.8	-3.4
	CABA	81.3	80.4	80.1	81.6	81.7	0.9	-1.2	1.3	-1.7
	Tierra del Fuego	83.2	80.2	80.2	82.5	82.7	3.0	-2.3	2.9	-2.5
